# Supplementary material for: Two methods for the preparation of sitagliptin phosphate via chemical resolution and asymmetric hydrogenation
Source: PubMed Central journal article supplement — RSC Adv. 2021 Jan 25;11(8):4805–9. doi: 10.1039/d0ra10273c (PMC8694546; doi:10.1039/d0ra10273c), 2021-01-25
Supplement: RA-011-D0RA10273C-s001.pdf [file RA-011-D0RA10273C-s001.pdf]

## Two methods for the preparation of sitagliptin phosphate via chemical resolution and asymmetric hydrogenation

Fei Ye,<sup>\*a</sup> Zhifeng Zhang,<sup>a</sup> Wenxia Zhao,<sup>a</sup> Jianhai Ding,<sup>a</sup> Yali Wang<sup>a</sup>

<sup>a</sup>School of Chemistry and Chemical Engineering, Ningxia Normal University, Guyuan, 756000, China

Corresponding author(s): Fei Ye (email:yefeiqq@163.com)

### Abstract

Two effective processes have been developed for the preparation of sitagliptin phosphate. The approach of chemical resolution obtained R-sitagliptin in five steps from commercially available starting materials using the inexpensive NaBH<sub>4</sub> to reduce the enamine and then using (-)-Di-p-toluoyl-L-tartaric acid to resolute racemates in 11% yield overall. The route successfully avoids the use of expensive noble metal as catalysts compared with traditional synthesis methods, resulting in greatly reduced costs and simplified synthetic routes. Other alternative asymmetric hydrogenation of β-ketamide route of the synthesis of sitagliptin was found, two of the intermediates were firstly synthesized.

**Keywords:** Type 2 diabetes; Sitagliptin phosphate; Chemical resolution; Asymmetric hydrogenation; Synthesis

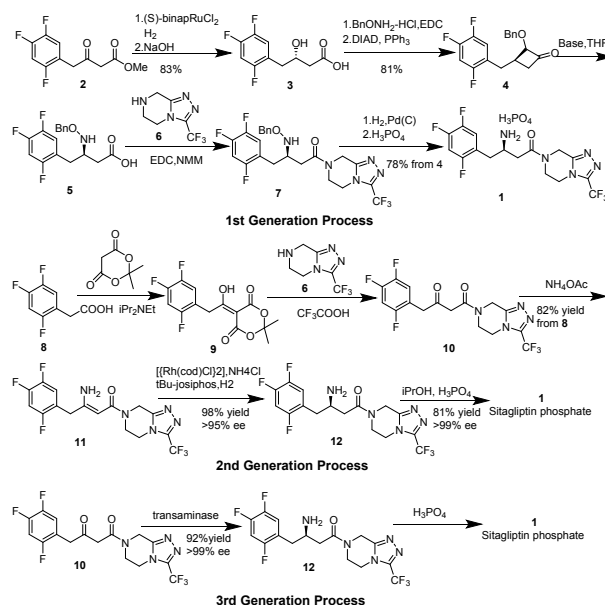

Scheme 1 Merck's three generations synthesis processes

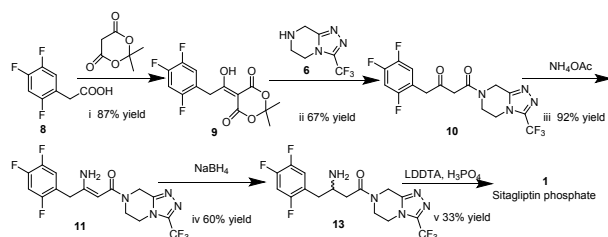

**Scheme 2** The process for the preparation of sitagliptin phosphate via chemical resolution

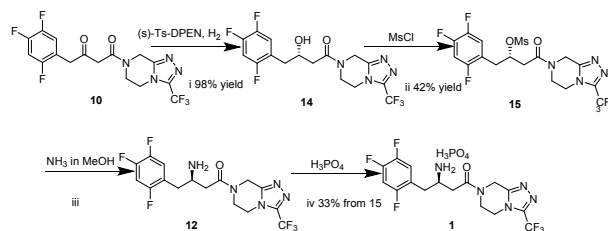

**Scheme 3** The process for the preparation of sitagliptin phosphate via asymmetric hydrogenation

HPLC chromatograms and  $^1\text{H}$  and  $^{13}\text{C}$  NMR spectra copies of the product and key intermediates are provided as follows:

Chromatography: LC-10A-14  
 Column Temperature : AT  
 Sample: PSLT-4-091208滤固  
 Source: 叶飞 (科1)  
 Operator: 叶飞

Chromatography Column: VP-ODS (150mm\*4.6mm\*5um)  
 DET: SPD-10A  $\lambda$ =254nm 1.2mL/min  
 Mobile Phase: A: 乙腈: 水=40: 60 (+0.1%TFA, (NH4)2HPO4)  
 B: 乙腈 A: B=70:30  
 Check:

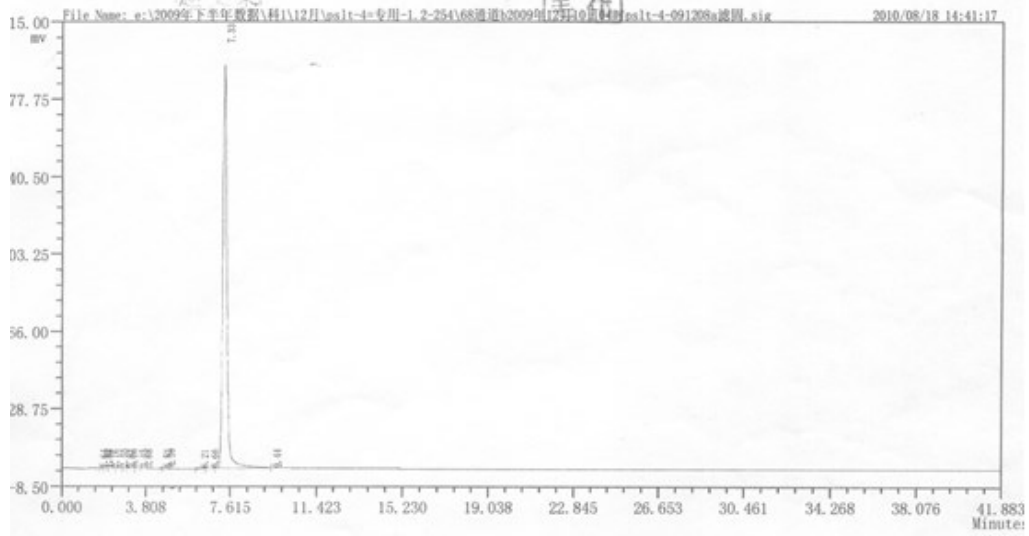

| ID | 保留时间  | 峰高     | 峰面积       | 浓度      | 峰型 | 组分名 |
|----|-------|--------|-----------|---------|----|-----|
| 0  | 1.642 | 50     | 331.4     | 0.0135  | MM |     |
| 1  | 1.817 | 330    | 2005.6    | 0.0815  | MM |     |
| 2  | 1.883 | 150    | 1127.3    | 0.0458  | MM |     |
| 3  | 2.158 | 197    | 1544.0    | 0.0628  | MM |     |
| 4  | 2.550 | 283    | 1915.3    | 0.0778  | MM |     |
| 5  | 2.867 | 80     | 483.4     | 0.0196  | MM |     |
| 6  | 3.000 | 408    | 2872.0    | 0.1167  | MM |     |
| 7  | 3.450 | 22     | 171.0     | 0.0070  | MM |     |
| 8  | 3.675 | 66     | 513.3     | 0.0209  | MM |     |
| 9  | 4.517 | 26     | 144.5     | 0.0059  | MM |     |
| 10 | 4.700 | 586    | 4649.8    | 0.1890  | MM |     |
| 11 | 6.208 | 121    | 1551.6    | 0.0631  | MM |     |
| 12 | 6.658 | 146    | 1464.1    | 0.0595  | MM |     |
| 13 | 7.333 | 194306 | 2439608.9 | 99.1529 | MM |     |
| 14 | 9.442 | 152    | 2068.8    | 0.0841  | MM |     |

HPLC spectra of 5-[1-Hydroxy-2-(2,4,5-trifluorophenyl) ethylidene]-2,2-dimethyl-1,3-dioxane-4,6-dione **9**

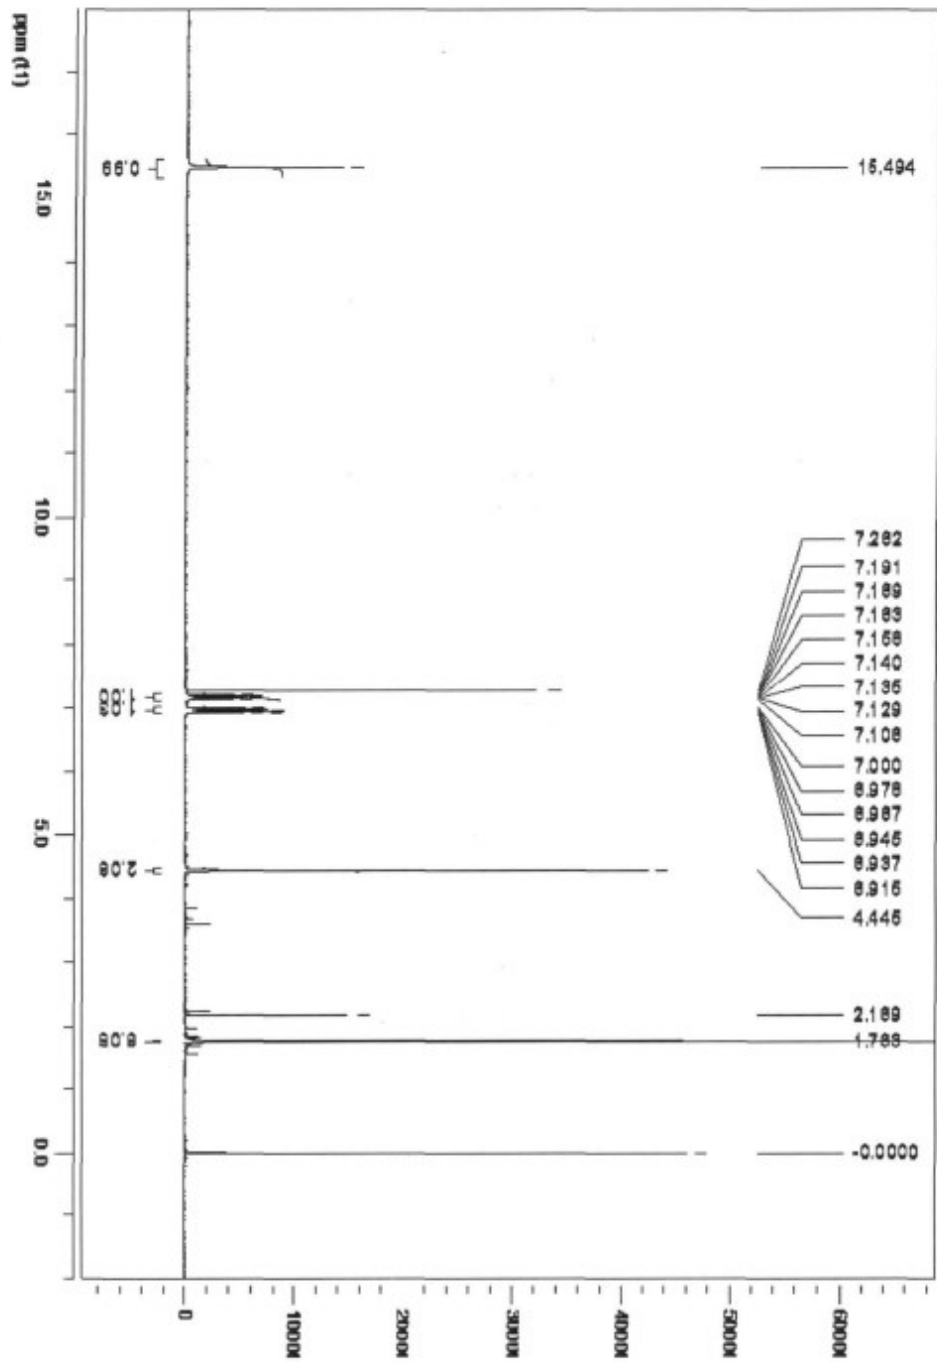

1H NMR spectra of 5-[1-Hydroxy-2-(2,4,5-trifluorophenyl) ethylidene]-2,2-dimethyl-1,3-dioxane-4,6-dione **9**

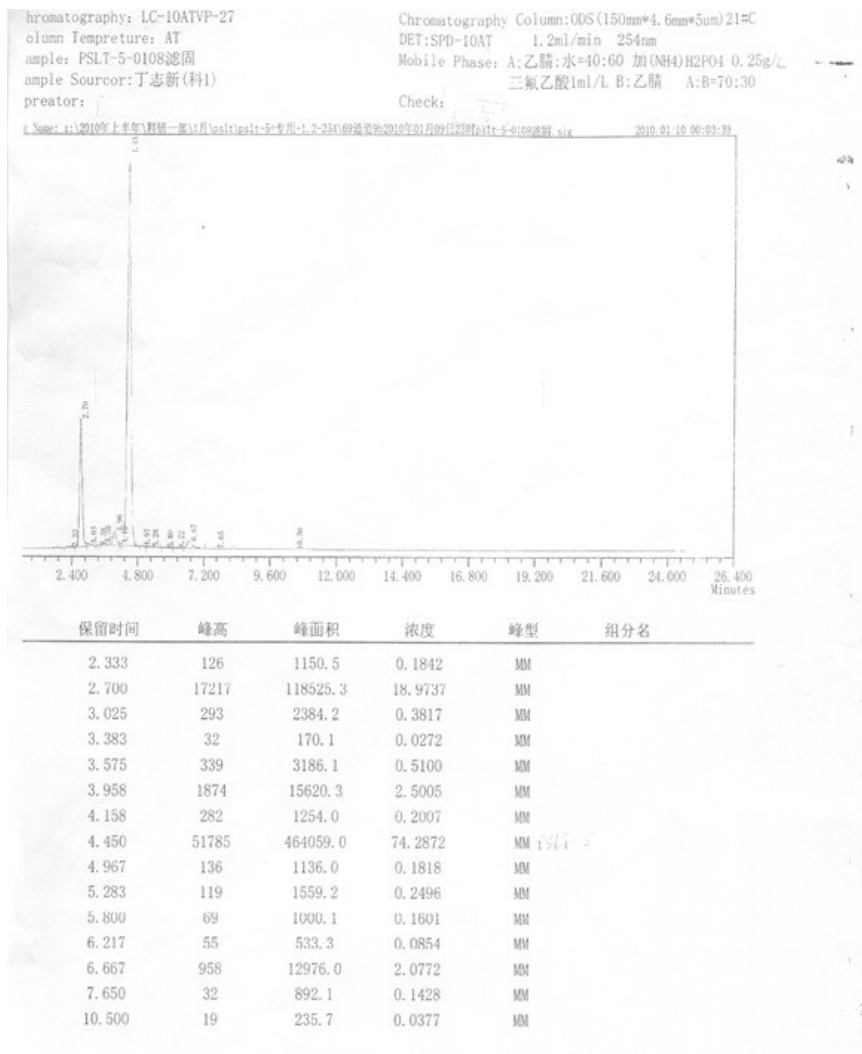

HPLC spectra of 4-oxo-4-[3-(trifluoromethyl)-5,6-dihydro[1,2,4]triazolo[4,3-a]pyrazin-7(8H)-yl]-1-(2,4,5-trifluorophenyl)butan-2-one **10**

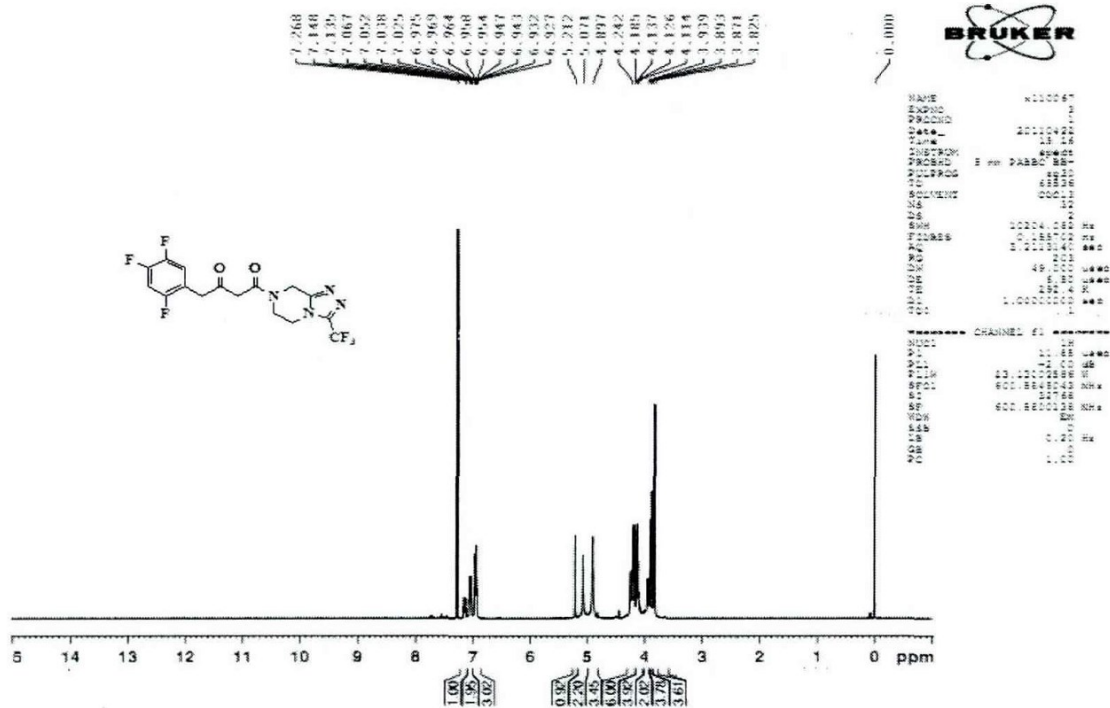

<sup>1</sup>H NMR spectra of 4-oxo-4-[3-(trifluoromethyl)-5,6-dihydro[1,2,4]triazolo[4,3-a]pyrazin-7(8H)-yl]-1-(2,4,5-trifluorophenyl)butan-2-one **10**

Chromatography LC-10AT-18  
 Column Temperature :AT  
 Sample:PSLT-B-6-091230滤固  
 Sample Source:叶飞(科一)  
 Operator: [Signature]

Chromatography Column:ODS(150mm\*4.6mm5um)Z0#J  
 DET SPD-10A λ=254nm 1.2ml/min  
 Mobile Phase:A:乙腈:水=40:60加(NH4)H2PO4 0.25g/L  
 +三氟乙酸1ml/L B:乙腈 A:B=70:30  
 Check:

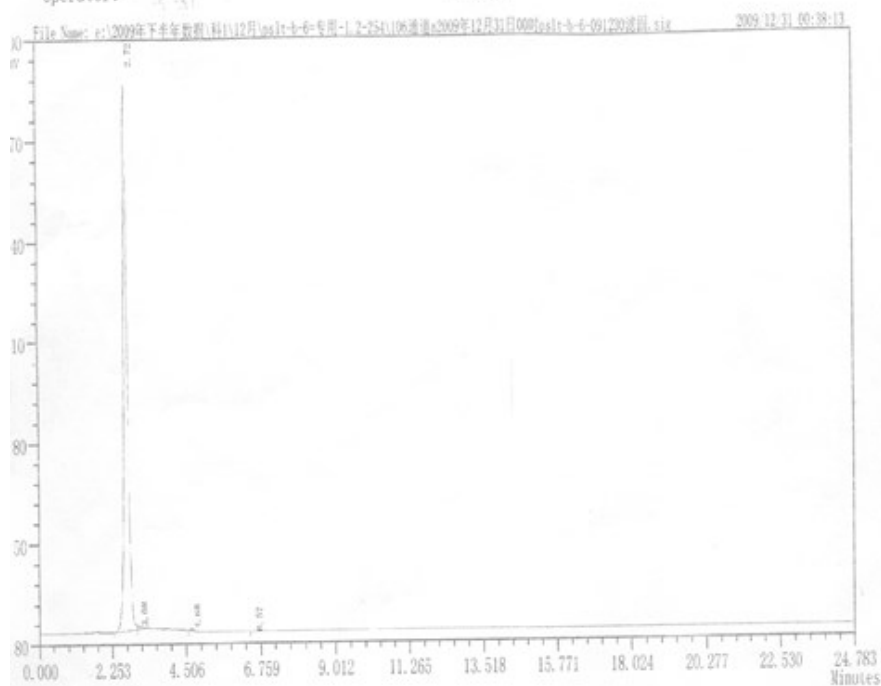

| ID | 保留时间  | 峰高    | 峰面积      | 浓度      | 峰型 | 组分名 |
|----|-------|-------|----------|---------|----|-----|
| 0  | 2.717 | 93675 | 783199.4 | 99.1283 | MM |     |
| 1  | 3.075 | 528   | 4261.1   | 0.5393  | MM |     |
| 2  | 4.675 | 349   | 2561.7   | 0.3242  | MM |     |
| 3  | 6.567 | 9     | 64.0     | 0.0081  | MM |     |

HPLC spectra of (Z)-3-Amino-1-(3-trifluoromethyl-5,6-dihydro-8H-[1,2,4]triazolo[4,3-a]pyrazin-7-yl)-4-(2,4,5-trifluoro-phenyl)-but-2-en-1-one **11**

Column Temperature : AT  
 Chromatography: LC-10AT-5  
 Sample: PSLT-B-8-0715拆后打浆  
 Sample Source: 时飞(科1)  
 Operator: 王博博

AT C: 25 RH%: 50+  
 Chromatography Column: ODS-VP(150mm\*4.6\*5um)17=1  
 DET: SPD-10A λ=254nm 1ml/min  
 Mobile Phase: 甲醇:乙腈:水=42:18:40(+0.02%三乙胺)  
 Check:

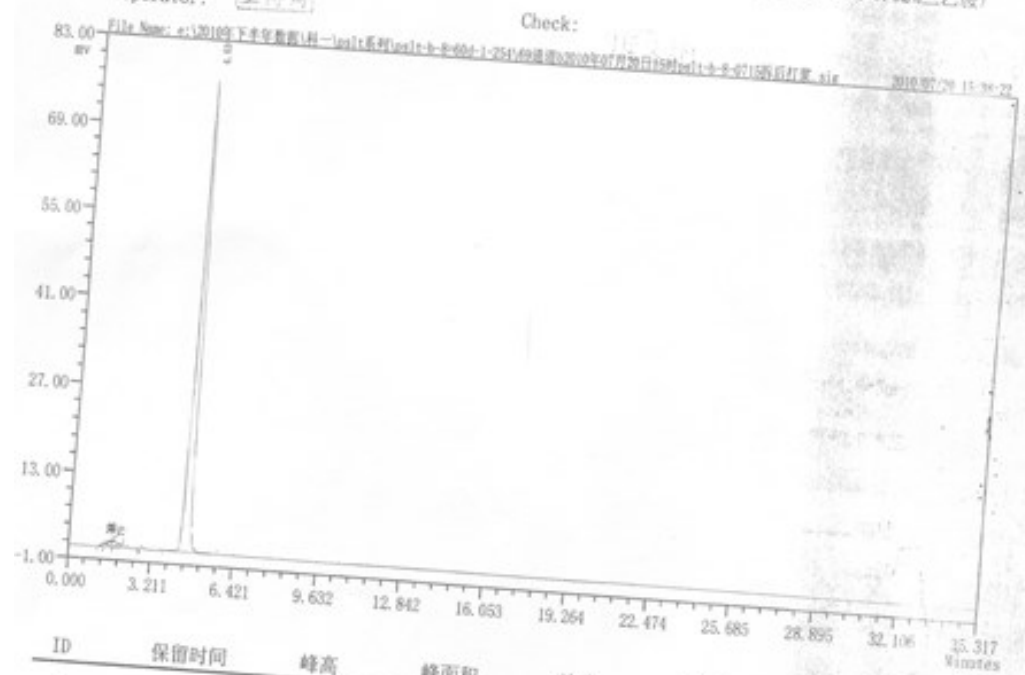

| ID | 保留时间  | 峰高    | 峰面积      | 浓度      | 峰型 | 组分名 |
|----|-------|-------|----------|---------|----|-----|
| 0  | 1.375 | 285   | 2435.9   | 0.2812  | MM |     |
| 1  | 1.458 | 588   | 5155.4   | 0.5952  | MM |     |
| 2  | 1.792 | 88    | 583.3    | 0.0673  | MM |     |
| 3  | 4.525 | 75287 | 857935.1 | 99.0562 | MM |     |

HPLC spectra of Sitagliptin 1



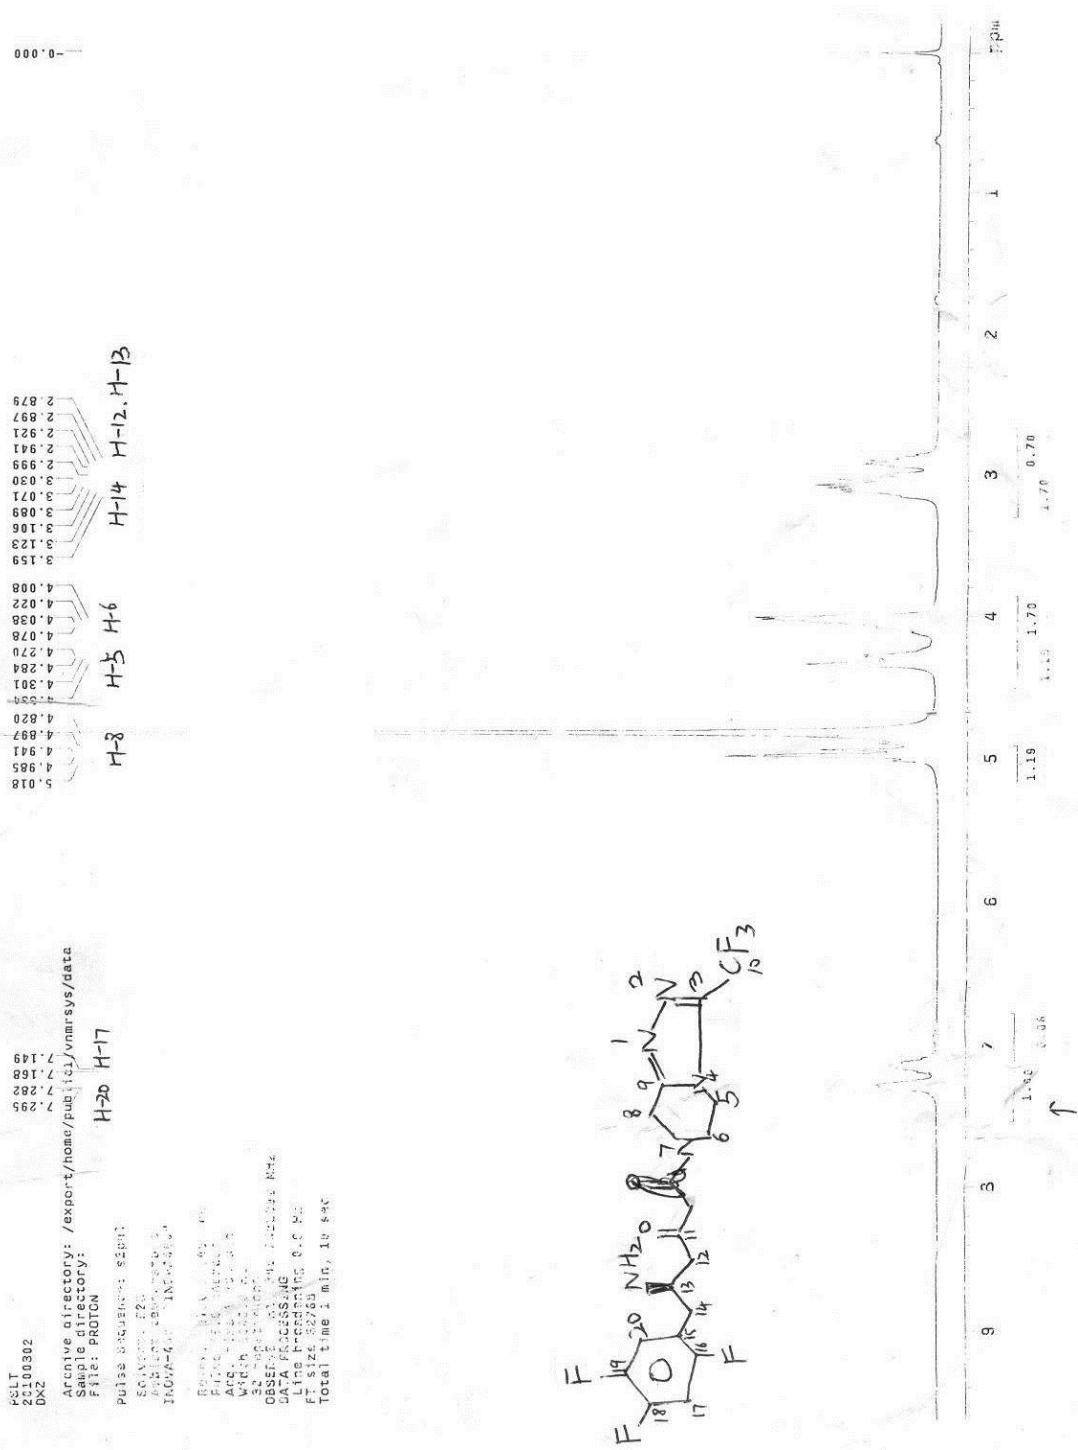

1H NMR spectra of Sitagliptin 1 in Scheme 2

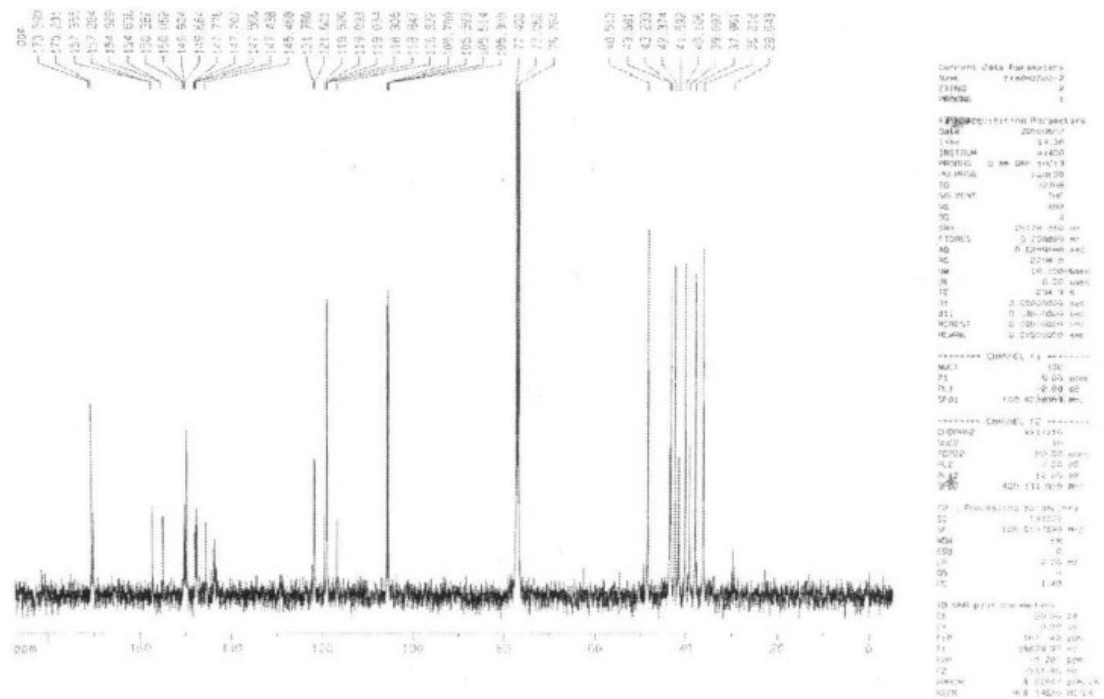

13C NMR spectra of Sitagliptin 1 in Scheme 2

Chromatography: LC-28  
 Column Temperature : AT  
 Sample: PSLT-B-8-0709拆重2  
 Source: 叶飞(科一)  
 Operator:

Chromatography Column: VP-ODS (150mm\*4.6mm 5um) 23#C  
 DET: SPD-10A  $\lambda=265\text{nm}$  0.5mL/min  
 Mobile Phase: 正己烷:乙醇=60:40-0.5-265

Check:

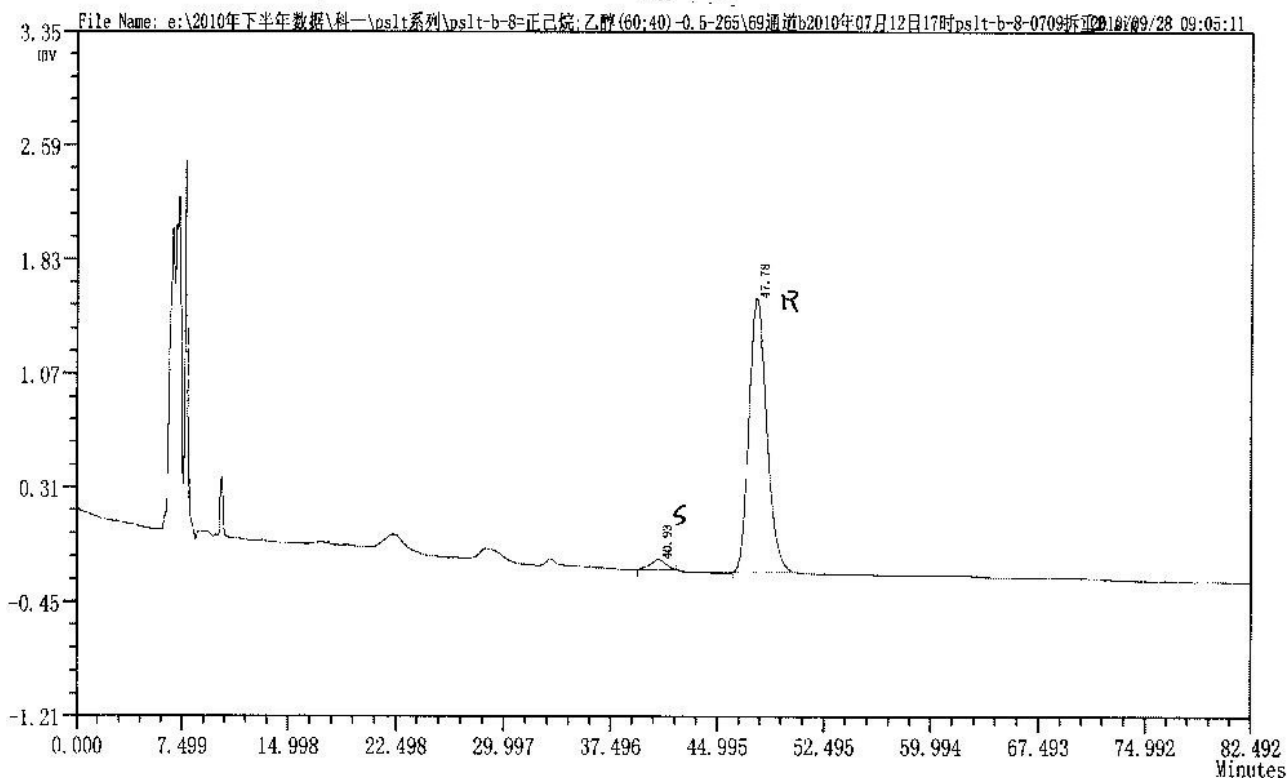

| ID | 保留时间   | 峰高   | 峰面积      | 浓度      | 峰型   | 组分名 |
|----|--------|------|----------|---------|------|-----|
| 0  | 40.933 | 69   | 5135.0   | 1.8245  | MM S |     |
| 1  | 47.783 | 1830 | 159210.5 | 98.1755 | MM R |     |

Chiral HPLC chromatograms of R-Sitagliptin 1

Chromatography: LC-28  
 Column Temperature : AT  
 Sample: PSLT-B-8-0807重液析  
 Source: 叶飞(科一)  
 Operator: 叶飞

Chromatography Column: VP-ODS(150mm\*4.6mm 5um)23#C  
 DET: SPD-10A  $\lambda$  = 265nm 0.5mL/min  
 Mobile Phase: 正己烷:乙醇=60:40-0.5-265

Check: 叶飞

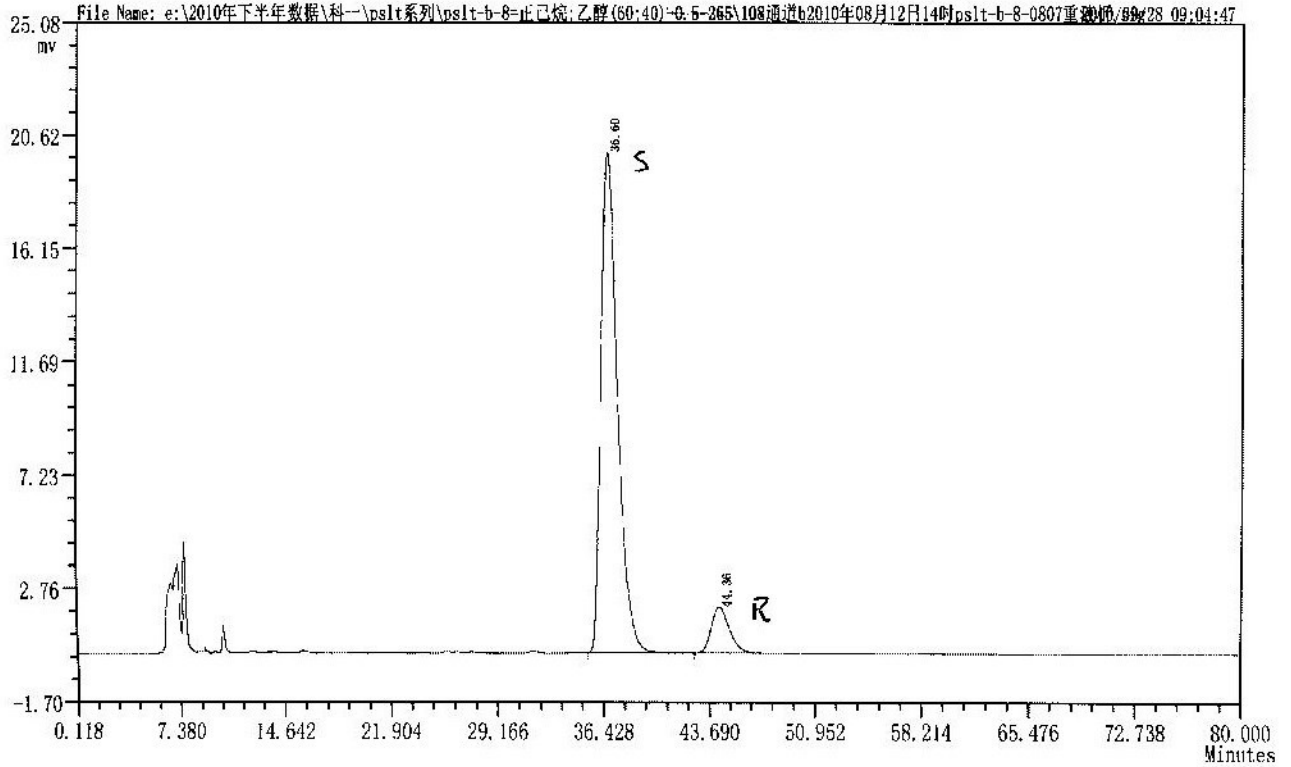

| ID | 保留时间   | 峰高    | 峰面积       | 浓度      | 峰型   | 组分名 |
|----|--------|-------|-----------|---------|------|-----|
| 0  | 36.600 | 19681 | 1543880.1 | 90.7566 | MM S |     |
| 1  | 44.358 | 1817  | 157241.0  | 9.2434  | MM R |     |

Chiral HPLC chromatograms of S-Sitagliptin

1H PSIT-A-7-100409 DMSO 3.3mg/0.6ml  
E:/2010 100527-rullian-yf E1F1

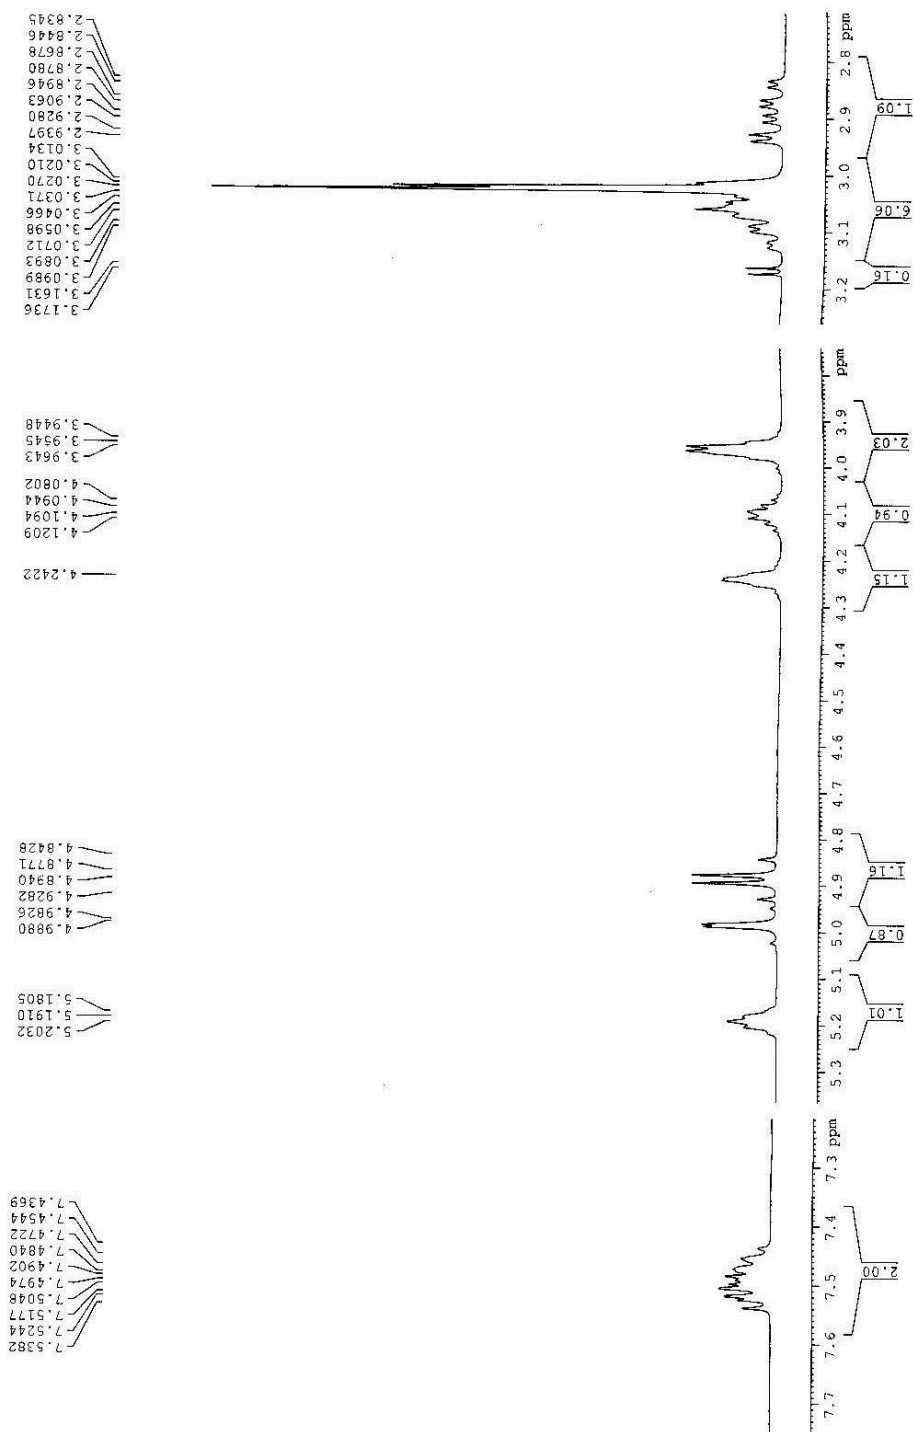

1H NMR spectra of methanesulfonate 15

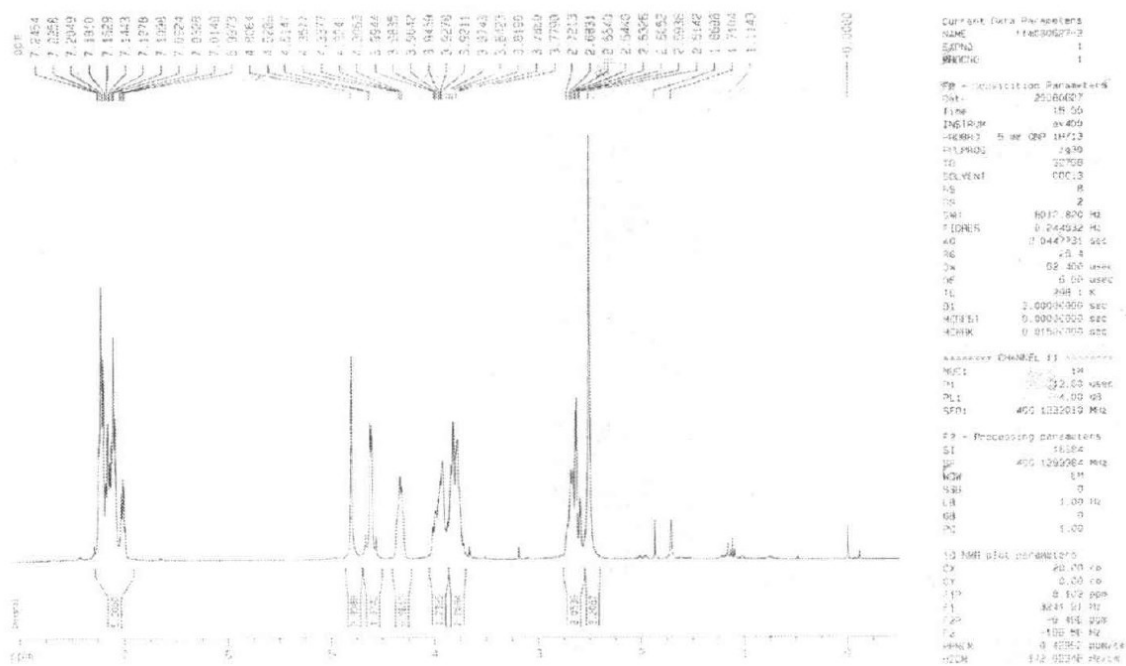

1H NMR spectra of Sitagliptin 1 in Scheme 3

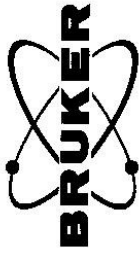

C13CPD PSLT-A-9-100507 D2O 14.8mg/0.6ml  
E:/2010 100527-rulliar-yf E1F1

```

NAME      PSLT-A-9-100507
EXPNO     13
PROCNO    1
Date_     20100527
Time      13.01
INSTRUM   spect
PROBHD    5 mm PABBO BB-
PULPROG   zgpg30
TD         65536
SOLVENT   D2O
NS         2048
DS         4
SWH        30030.029 Hz
FIDRES     0.458222 Hz
AQ         1.0912410 sec
RG         1149.4
DW         16.650 usec
DE         6.50 usec
TE         298.0 K
D1         2.0000000 sec
D11        0.03000000 sec
TD0        1
  
```

```

===== CHANNEL f1 =====
NUC1       13C
P1         9.40 usec
PL1        2.00 dB
PL1W       64.82212830 W
SF01       125.7703643 MHz

===== CHANNEL f2 =====
CPDPRG2    waltz16
NUC2       1H
PCPD2      80.00 usec
PL2         0.00 dB
PL12       15.80 dB
PL13       15.80 dB
PL2W       17.28177834 W
PL12W      0.45455706 W
PL13W      0.45455706 W
SF02       500.1320005 MHz
SI         32768
SF         125.7577890 MHz
WDW         EM
SSB         0
LB          3.00 Hz
GB          0
PC         1.40
  
```

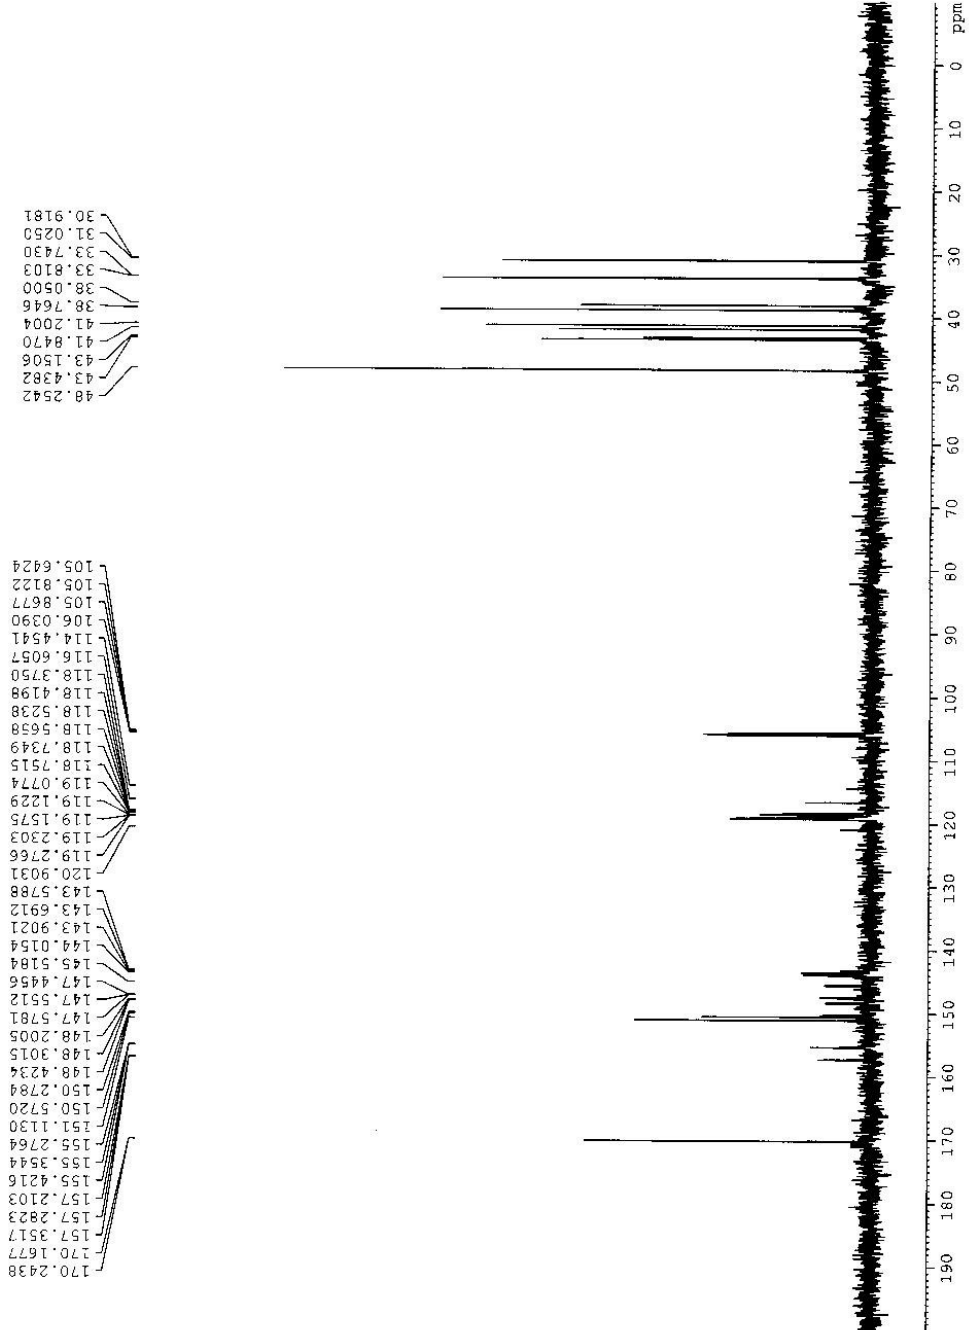

13C NMR spectra of Sitagliptin 1 in Scheme 3
